# Supplementary material
Source: MDPI journal article supplement (https://www.mdpi.com/2073-4352/13/2/270)
Supplement: s1 [file s1]

Structural origin of anisotropic thermal expansion of  
molecular crystals and implication for the density rule  
probed with four ROY polymorphs

*Supporting Information*

*Sayantana Chattoraj<sup>1,2</sup> and Changquan Calvin Sun\*<sup>1</sup>*

<sup>1</sup> Pharmaceutical Materials Science and Engineering Laboratory, Department of  
Pharmaceutics, University of Minnesota, MN, USA

<sup>2</sup> Current address: Process Engineering and Analytics, Drug Product Development, GSK  
R&D, Collegeville, PA, USA

\* Changquan Calvin Sun, Ph.D.

9-127B Weaver Densford Hall, 308 Harvard Street SE, Minneapolis, MN 55455, USA.

Fax: +1-612-626-2125; Tel: +1-612-624-3722; E-mail: sunx0053@umn.edu.

## **1. Crystal structure solutions of ROY polymorphs**

For each polymorph, a suitable single crystal was fixed onto the tip of a 0.1 mm diameter glass fiber with epoxy (~5 min drying time) and mounted on a Bruker Apex II CCD area detector diffractometer (Bruker AXS, Madison, WI) for data collection using MoK $\alpha$  radiation (graphite monochromator). Data processing was accomplished with the SAINT processing program. The structure was solved using Bruker SHELXTL and refined using Bruker SHELXTL. A direct-methods solution was calculated, which provided all non-hydrogen atoms from the E-map. Full-matrix least squares/difference Fourier cycles were performed. All non-hydrogen atoms were refined with anisotropic displacement parameters. All hydrogen atoms were located at their general positions. Key crystal data and data collection parameters are summarized in Tables S1-S13.

**Table S1.** Crystal data and structure refinement for polymorph Y at 123K.

|                                        |                                                                    |                             |
|----------------------------------------|--------------------------------------------------------------------|-----------------------------|
| Identification code                    | y123                                                               |                             |
| Empirical formula                      | C <sub>12</sub> H <sub>9</sub> N <sub>3</sub> O <sub>2</sub> S     |                             |
| Formula weight                         | 259.28                                                             |                             |
| Temperature                            | 123(2) K                                                           |                             |
| Wavelength                             | 0.71073 Å                                                          |                             |
| Crystal system                         | MONOCLINIC                                                         |                             |
| Space group                            | P2(1)/n                                                            |                             |
| Unit cell dimensions                   | $a = 8.4794(5)$ Å                                                  | $\alpha = 90^\circ$         |
|                                        | $b = 16.0479(9)$ Å                                                 | $\beta = 91.4120(10)^\circ$ |
|                                        | $c = 8.4869(5)$ Å                                                  | $\gamma = 90^\circ$         |
| Volume                                 | 1154.52(12) Å <sup>3</sup>                                         |                             |
| Z                                      | 4                                                                  |                             |
| Density (calculated)                   | 1.492 Mg/m <sup>3</sup>                                            |                             |
| Absorption coefficient                 | 0.277 mm <sup>-1</sup>                                             |                             |
| $F(000)$                               | 536                                                                |                             |
| Crystal color, morphology              | yellow, block                                                      |                             |
| Crystal size                           | 0.42 x 0.35 x 0.30 mm <sup>3</sup>                                 |                             |
| Theta range for data collection        | 2.54 to 27.55°                                                     |                             |
| Index ranges                           | $-11 \leq h \leq 11$ , $-20 \leq k \leq 20$ , $-10 \leq l \leq 11$ |                             |
| Reflections collected                  | 26058                                                              |                             |
| Independent reflections                | 2650 [ $R(\text{int}) = 0.0283$ ]                                  |                             |
| Observed reflections                   | 2428                                                               |                             |
| Completeness to $\theta = 27.56^\circ$ | 99.3%                                                              |                             |
| Absorption correction                  | Multi-scan                                                         |                             |
| Max. and min. transmission             | 0.9215 and 0.8925                                                  |                             |
| Refinement method                      | Full-matrix least-squares on $F^2$                                 |                             |
| Data / restraints / parameters         | 2650 / 0 / 163                                                     |                             |
| Goodness-of-fit on $F^2$               | 1.047                                                              |                             |
| Final $R$ indices [ $I > 2\sigma(I)$ ] | $R1 = 0.0325$ , $wR2 = 0.0861$                                     |                             |
| $R$ indices (all data)                 | $R1 = 0.0356$ , $wR2 = 0.0889$                                     |                             |
| Largest diff. peak and hole            | 0.304 and -0.353 e.Å <sup>-3</sup>                                 |                             |

**Table S2.** Crystal data and structure refinement for polymorph Y at 173K.

|                                        |                                                                    |                             |
|----------------------------------------|--------------------------------------------------------------------|-----------------------------|
| Identification code                    | y173                                                               |                             |
| Empirical formula                      | C <sub>12</sub> H <sub>9</sub> N <sub>3</sub> O <sub>2</sub> S     |                             |
| Formula weight                         | 259.28                                                             |                             |
| Temperature                            | 173(2) K                                                           |                             |
| Wavelength                             | 0.71073 Å                                                          |                             |
| Crystal system                         | MONOCLINIC                                                         |                             |
| Space group                            | P2(1)/n                                                            |                             |
| Unit cell dimensions                   | $a = 8.4847(4)$ Å                                                  | $\alpha = 90^\circ$         |
|                                        | $b = 16.1377(8)$ Å                                                 | $\beta = 91.5450(10)^\circ$ |
|                                        | $c = 8.5031(4)$ Å                                                  | $\gamma = 90^\circ$         |
| Volume                                 | 1163.85(10) Å <sup>3</sup>                                         |                             |
| Z                                      | 4                                                                  |                             |
| Density (calculated)                   | 1.480 Mg/m <sup>3</sup>                                            |                             |
| Absorption coefficient                 | 0.275 mm <sup>-1</sup>                                             |                             |
| $F(000)$                               | 536                                                                |                             |
| Crystal color, morphology              | yellow, block                                                      |                             |
| Crystal size                           | 0.42 x 0.35 x 0.30 mm <sup>3</sup>                                 |                             |
| Theta range for data collection        | 2.52 to 27.58°                                                     |                             |
| Index ranges                           | $-11 \leq h \leq 11$ , $-20 \leq k \leq 20$ , $-10 \leq l \leq 11$ |                             |
| Reflections collected                  | 26296                                                              |                             |
| Independent reflections                | 2673 [ $R(\text{int}) = 0.0314$ ]                                  |                             |
| Observed reflections                   | 2396                                                               |                             |
| Completeness to theta = 27.61°         | 99.1%                                                              |                             |
| Absorption correction                  | Multi-scan                                                         |                             |
| Max. and min. transmission             | 0.9221 and 0.8933                                                  |                             |
| Refinement method                      | Full-matrix least-squares on $F^2$                                 |                             |
| Data / restraints / parameters         | 2673 / 0 / 163                                                     |                             |
| Goodness-of-fit on $F^2$               | 1.049                                                              |                             |
| Final $R$ indices [ $I > 2\sigma(I)$ ] | $R1 = 0.0351$ , $wR2 = 0.0896$                                     |                             |
| $R$ indices (all data)                 | $R1 = 0.0400$ , $wR2 = 0.0945$                                     |                             |
| Largest diff. peak and hole            | 0.255 and -0.325 e.Å <sup>-3</sup>                                 |                             |

**Table S3.** Crystal data and structure refinement for polymorph Y at 223K.

|                                   |                                                                |                   |
|-----------------------------------|----------------------------------------------------------------|-------------------|
| Identification code               | y223                                                           |                   |
| Empirical formula                 | C <sub>12</sub> H <sub>9</sub> N <sub>3</sub> O <sub>2</sub> S |                   |
| Formula weight                    | 259.28                                                         |                   |
| Temperature                       | 223(2) K                                                       |                   |
| Wavelength                        | 0.71073 Å                                                      |                   |
| Crystal system                    | MONOCLINIC                                                     |                   |
| Space group                       | P2(1)/n                                                        |                   |
| Unit cell dimensions              | a = 8.4866(5) Å                                                | α = 90°.          |
|                                   | b = 16.2347(10) Å                                              | β = 91.6590(10)°. |
|                                   | c = 8.5160(5) Å                                                | γ = 90°.          |
| Volume                            | 1172.82(12) Å <sup>3</sup>                                     |                   |
| Z                                 | 4                                                              |                   |
| Density (calculated)              | 1.468 Mg/m <sup>3</sup>                                        |                   |
| Absorption coefficient            | 0.273 mm <sup>-1</sup>                                         |                   |
| F(000)                            | 536                                                            |                   |
| Crystal color, morphology         | yellow, block                                                  |                   |
| Crystal size                      | 0.42 x 0.35 x 0.30 mm <sup>3</sup>                             |                   |
| Theta range for data collection   | 2.51 to 27.57°.                                                |                   |
| Index ranges                      | -11 ≤ h ≤ 11, -20 ≤ k ≤ 20, -11 ≤ l ≤ 10                       |                   |
| Reflections collected             | 13254                                                          |                   |
| Independent reflections           | 2688 [R(int) = 0.0317]                                         |                   |
| Completeness to theta = 27.58°    | 99.2 %                                                         |                   |
| Absorption correction             | Multi-scan                                                     |                   |
| Max. and min. transmission        | 0.9227 and 0.8941                                              |                   |
| Refinement method                 | Full-matrix least-squares on F <sup>2</sup>                    |                   |
| Data / restraints / parameters    | 2688 / 0 / 163                                                 |                   |
| Goodness-of-fit on F <sup>2</sup> | 1.049                                                          |                   |
| Final R indices [I > 2σ(I)]       | R1 = 0.0366, wR2 = 0.0984                                      |                   |
| R indices (all data)              | R1 = 0.0441, wR2 = 0.1046                                      |                   |
| Largest diff. peak and hole       | 0.213 and -0.315 e.Å <sup>-3</sup>                             |                   |

**Table S4.** Crystal data and structure refinement for polymorph Y at 273K.

|                                   |                                                                |                |
|-----------------------------------|----------------------------------------------------------------|----------------|
| Identification code               | y273                                                           |                |
| Empirical formula                 | C <sub>12</sub> H <sub>9</sub> N <sub>3</sub> O <sub>2</sub> S |                |
| Formula weight                    | 259.28                                                         |                |
| Temperature                       | 273(2) K                                                       |                |
| Wavelength                        | 0.71073 Å                                                      |                |
| Crystal system                    | MONOCLINIC                                                     |                |
| Space group                       | P2(1)/n                                                        |                |
| Unit cell dimensions              | a = 8.477(19) Å                                                | α = 90°.       |
|                                   | b = 16.35(4) Å                                                 | β = 91.63(3)°. |
|                                   | c = 8.532(19) Å                                                | γ = 90°.       |
| Volume                            | 1182(5) Å <sup>3</sup>                                         |                |
| Z                                 | 4                                                              |                |
| Density (calculated)              | 1.457 Mg/m <sup>3</sup>                                        |                |
| Absorption coefficient            | 0.270 mm <sup>-1</sup>                                         |                |
| F(000)                            | 536                                                            |                |
| Crystal color, morphology         | yellow, block                                                  |                |
| Crystal size                      | 0.42 x 0.35 x 0.30 mm <sup>3</sup>                             |                |
| Theta range for data collection   | 2.39 to 27.52°.                                                |                |
| Index ranges                      | -11 ≤ h ≤ 11, -21 ≤ k ≤ 21, -10 ≤ l ≤ 11                       |                |
| Reflections collected             | 13237                                                          |                |
| Independent reflections           | 2702 [R(int) = 0.0352]                                         |                |
| Completeness to theta = 27.55°    | 99.3 %                                                         |                |
| Absorption correction             | Multi-scan                                                     |                |
| Max. and min. transmission        | 0.9233 and 0.8949                                              |                |
| Refinement method                 | Full-matrix least-squares on F <sup>2</sup>                    |                |
| Data / restraints / parameters    | 2702 / 0 / 163                                                 |                |
| Goodness-of-fit on F <sup>2</sup> | 1.042                                                          |                |
| Final R indices [I > 2σ(I)]       | R1 = 0.0382, wR2 = 0.1023                                      |                |
| R indices (all data)              | R1 = 0.0492, wR2 = 0.1109                                      |                |
| Largest diff. peak and hole       | 0.191 and -0.319 e.Å <sup>-3</sup>                             |                |

**Table S5.** Crystal data and structure refinement for polymorph OP at 123K.

|                                   |                                                                |                              |
|-----------------------------------|----------------------------------------------------------------|------------------------------|
| Identification code               | op123                                                          |                              |
| Empirical formula                 | C <sub>12</sub> H <sub>9</sub> N <sub>3</sub> O <sub>2</sub> S |                              |
| Formula weight                    | 259.28                                                         |                              |
| Temperature                       | 123(2) K                                                       |                              |
| Wavelength                        | 0.71073 Å                                                      |                              |
| Crystal system                    | MONOCLINIC                                                     |                              |
| Space group                       | P2(1)/n                                                        |                              |
| Unit cell dimensions              | a = 7.7350(19) Å                                               | $\alpha = 90^\circ$ .        |
|                                   | b = 13.284(3) Å                                                | $\beta = 104.090(3)^\circ$ . |
|                                   | c = 11.634(3) Å                                                | $\gamma = 90^\circ$ .        |
| Volume                            | 1159.5(5) Å <sup>3</sup>                                       |                              |
| Z                                 | 4                                                              |                              |
| Density (calculated)              | 1.485 Mg/m <sup>3</sup>                                        |                              |
| Absorption coefficient            | 0.276 mm <sup>-1</sup>                                         |                              |
| F(000)                            | 536                                                            |                              |
| Crystal color, morphology         | orange, prism                                                  |                              |
| Crystal size                      | 0.30 x 0.20 x 0.10 mm <sup>3</sup>                             |                              |
| Theta range for data collection   | 2.37 to 27.58°.                                                |                              |
| Index ranges                      | -9 ≤ h ≤ 10, -17 ≤ k ≤ 17, -15 ≤ l ≤ 15                        |                              |
| Reflections collected             | 13065                                                          |                              |
| Independent reflections           | 2673 [R(int) = 0.0319]                                         |                              |
| Completeness to theta = 27.64°    | 99.4 %                                                         |                              |
| Absorption correction             | Multi-scan                                                     |                              |
| Max. and min. transmission        | 0.9729 and 0.9218                                              |                              |
| Refinement method                 | Full-matrix least-squares on F <sup>2</sup>                    |                              |
| Data / restraints / parameters    | 2673 / 0 / 163                                                 |                              |
| Goodness-of-fit on F <sup>2</sup> | 1.045                                                          |                              |
| Final R indices [I > 2σ(I)]       | R1 = 0.0340, wR2 = 0.0916                                      |                              |
| R indices (all data)              | R1 = 0.0422, wR2 = 0.0979                                      |                              |
| Largest diff. peak and hole       | 0.271 and -0.313 e.Å <sup>-3</sup>                             |                              |

**Table S6.** Crystal data and structure refinement for polymorph OP at 173K.

|                                   |                                                                |                  |
|-----------------------------------|----------------------------------------------------------------|------------------|
| Identification code               | op173                                                          |                  |
| Empirical formula                 | C <sub>12</sub> H <sub>9</sub> N <sub>3</sub> O <sub>2</sub> S |                  |
| Formula weight                    | 259.28                                                         |                  |
| Temperature                       | 173(2) K                                                       |                  |
| Wavelength                        | 0.71073 Å                                                      |                  |
| Crystal system                    | MONOCLINIC                                                     |                  |
| Space group                       | P2(1)/n                                                        |                  |
| Unit cell dimensions              | a = 7.7952(11) Å                                               | α = 90°.         |
|                                   | b = 13.2970(19) Å                                              | β = 104.191(2)°. |
|                                   | c = 11.6398(17) Å                                              | γ = 90°.         |
| Volume                            | 1169.7(3) Å <sup>3</sup>                                       |                  |
| Z                                 | 4                                                              |                  |
| Density (calculated)              | 1.472 Mg/m <sup>3</sup>                                        |                  |
| Absorption coefficient            | 0.273 mm <sup>-1</sup>                                         |                  |
| F(000)                            | 536                                                            |                  |
| Crystal color, morphology         | orange, prism                                                  |                  |
| Crystal size                      | 0.30 x 0.20 x 0.10 mm <sup>3</sup>                             |                  |
| Theta range for data collection   | 2.37 to 27.55°.                                                |                  |
| Index ranges                      | -10 ≤ h ≤ 10, -17 ≤ k ≤ 17, -15 ≤ l ≤ 15                       |                  |
| Reflections collected             | 13186                                                          |                  |
| Independent reflections           | 2696 [R(int) = 0.0282]                                         |                  |
| Completeness to theta = 27.61°    | 99.6 %                                                         |                  |
| Absorption correction             | Multi-scan                                                     |                  |
| Max. and min. transmission        | 0.9732 and 0.9225                                              |                  |
| Refinement method                 | Full-matrix least-squares on F <sup>2</sup>                    |                  |
| Data / restraints / parameters    | 2696 / 0 / 163                                                 |                  |
| Goodness-of-fit on F <sup>2</sup> | 1.050                                                          |                  |
| Final R indices [I > 2σ(I)]       | R1 = 0.0340, wR2 = 0.0932                                      |                  |
| R indices (all data)              | R1 = 0.0414, wR2 = 0.0996                                      |                  |
| Largest diff. peak and hole       | 0.238 and -0.315 e.Å <sup>-3</sup>                             |                  |



**Table S7.** Crystal data and structure refinement for polymorph OP at 223K.

|                                   |                                                                |                    |
|-----------------------------------|----------------------------------------------------------------|--------------------|
| Identification code               | op223 (11151_0m)                                               |                    |
| Empirical formula                 | C <sub>12</sub> H <sub>9</sub> N <sub>3</sub> O <sub>2</sub> S |                    |
| Formula weight                    | 259.28                                                         |                    |
| Temperature                       | 223(2) K                                                       |                    |
| Wavelength                        | 0.71073 Å                                                      |                    |
| Crystal system                    | MONOCLINIC                                                     |                    |
| Space group                       | P2(1)/n                                                        |                    |
| Unit cell dimensions              | a = 7.8617(9) Å                                                | α = 90°.           |
|                                   | b = 13.3040(15) Å                                              | β = 104.3590(10)°. |
|                                   | c = 11.6499(13) Å                                              | γ = 90°.           |
| Volume                            | 1180.4(2) Å <sup>3</sup>                                       |                    |
| Z                                 | 4                                                              |                    |
| Density (calculated)              | 1.459 Mg/m <sup>3</sup>                                        |                    |
| Absorption coefficient            | 0.271 mm <sup>-1</sup>                                         |                    |
| F(000)                            | 536                                                            |                    |
| Crystal color, morphology         | orange, prism                                                  |                    |
| Crystal size                      | 0.30 x 0.20 x 0.10 mm <sup>3</sup>                             |                    |
| Theta range for data collection   | 2.37 to 27.51°.                                                |                    |
| Index ranges                      | -10 ≤ h ≤ 10, -17 ≤ k ≤ 17, -15 ≤ l ≤ 15                       |                    |
| Reflections collected             | 13344                                                          |                    |
| Independent reflections           | 2719 [R(int) = 0.0347]                                         |                    |
| Completeness to theta = 27.60°    | 99.3 %                                                         |                    |
| Absorption correction             | Multi-scan                                                     |                    |
| Max. and min. transmission        | 0.9734 and 0.9231                                              |                    |
| Refinement method                 | Full-matrix least-squares on F <sup>2</sup>                    |                    |
| Data / restraints / parameters    | 2719 / 0 / 163                                                 |                    |
| Goodness-of-fit on F <sup>2</sup> | 1.057                                                          |                    |
| Final R indices [I > 2σ(I)]       | R1 = 0.0403, wR2 = 0.1063                                      |                    |
| R indices (all data)              | R1 = 0.0537, wR2 = 0.1163                                      |                    |
| Largest diff. peak and hole       | 0.253 and -0.337 e.Å <sup>-3</sup>                             |                    |

**Table S8.** Crystal data and structure refinement for polymorph OP at 273.

|                                   |                                                                |                    |
|-----------------------------------|----------------------------------------------------------------|--------------------|
| Identification code               | op273                                                          |                    |
| Empirical formula                 | C <sub>12</sub> H <sub>9</sub> N <sub>3</sub> O <sub>2</sub> S |                    |
| Formula weight                    | 259.28                                                         |                    |
| Temperature                       | 273(2) K                                                       |                    |
| Wavelength                        | 0.71073 Å                                                      |                    |
| Crystal system                    | MONOCLINIC                                                     |                    |
| Space group                       | P2(1)/n                                                        |                    |
| Unit cell dimensions              | a = 7.9380(6) Å                                                | α = 90°.           |
|                                   | b = 13.3105(10) Å                                              | β = 104.5710(10)°. |
|                                   | c = 11.6658(9) Å                                               | γ = 90°.           |
| Volume                            | 1192.95(16) Å <sup>3</sup>                                     |                    |
| Z                                 | 4                                                              |                    |
| Density (calculated)              | 1.444 Mg/m <sup>3</sup>                                        |                    |
| Absorption coefficient            | 0.268 mm <sup>-1</sup>                                         |                    |
| F(000)                            | 536                                                            |                    |
| Crystal color, morphology         | orange, prism                                                  |                    |
| Crystal size                      | 0.30 x 0.20 x 0.10 mm <sup>3</sup>                             |                    |
| Theta range for data collection   | 2.37 to 26.67°.                                                |                    |
| Index ranges                      | -10 ≤ h ≤ 10, -17 ≤ k ≤ 17, -15 ≤ l ≤ 15                       |                    |
| Reflections collected             | 13509                                                          |                    |
| Independent reflections           | 2764 [R(int) = 0.0362]                                         |                    |
| Completeness to theta = 27.61°    | 99.6 %                                                         |                    |
| Absorption correction             | Multi-scan                                                     |                    |
| Max. and min. transmission        | 0.9737 and 0.9239                                              |                    |
| Refinement method                 | Full-matrix least-squares on F <sup>2</sup>                    |                    |
| Data / restraints / parameters    | 2764 / 0 / 163                                                 |                    |
| Goodness-of-fit on F <sup>2</sup> | 1.072                                                          |                    |
| Final R indices [I > 2σ(I)]       | R1 = 0.0437, wR2 = 0.1163                                      |                    |
| R indices (all data)              | R1 = 0.0615, wR2 = 0.1273                                      |                    |
| Largest diff. peak and hole       | 0.250 and -0.351 e.Å <sup>-3</sup>                             |                    |

**Table S9.** Crystal data and structure refinement for polymorph R at 123K.

|                                   |                                                                |                   |
|-----------------------------------|----------------------------------------------------------------|-------------------|
| Identification code               | r123                                                           |                   |
| Empirical formula                 | C <sub>12</sub> H <sub>9</sub> N <sub>3</sub> O <sub>2</sub> S |                   |
| Formula weight                    | 259.28                                                         |                   |
| Temperature                       | 123(2) K                                                       |                   |
| Wavelength                        | 0.71073 Å                                                      |                   |
| Crystal system                    | TRICLINIC                                                      |                   |
| Space group                       | P-1                                                            |                   |
| Unit cell dimensions              | a = 7.3167(5) Å                                                | α = 75.6110(10)°. |
|                                   | b = 7.6810(5) Å                                                | β = 77.4730(10)°. |
|                                   | c = 11.8714(7) Å                                               | γ = 64.4440(10)°. |
| Volume                            | 578.40(6) Å <sup>3</sup>                                       |                   |
| Z                                 | 2                                                              |                   |
| Density (calculated)              | 1.489 Mg/m <sup>3</sup>                                        |                   |
| Absorption coefficient            | 0.276 mm <sup>-1</sup>                                         |                   |
| F(000)                            | 268                                                            |                   |
| Crystal color, morphology         | red, block                                                     |                   |
| Crystal size                      | 0.30 x 0.20 x 0.15 mm <sup>3</sup>                             |                   |
| Theta range for data collection   | 2.99 to 27.57°.                                                |                   |
| Index ranges                      | -9 ≤ h ≤ 9, -9 ≤ k ≤ 9, -15 ≤ l ≤ 15                           |                   |
| Reflections collected             | 13346                                                          |                   |
| Independent reflections           | 2625 [R(int) = 0.0187]                                         |                   |
| Completeness to theta = 27.57°    | 98.1 %                                                         |                   |
| Absorption correction             | Multi-scan                                                     |                   |
| Max. and min. transmission        | 0.9597 and 0.9217                                              |                   |
| Refinement method                 | Full-matrix least-squares on F <sup>2</sup>                    |                   |
| Data / restraints / parameters    | 2625 / 0 / 163                                                 |                   |
| Goodness-of-fit on F <sup>2</sup> | 1.015                                                          |                   |
| Final R indices [I > 2σ(I)]       | R1 = 0.0334, wR2 = 0.0887                                      |                   |
| R indices (all data)              | R1 = 0.0359, wR2 = 0.0919                                      |                   |
| Largest diff. peak and hole       | 0.406 and -0.398 e.Å <sup>-3</sup>                             |                   |

**Table S10.** Crystal data and structure refinement for polymorph R at 173K.

|                                   |                                                                |                   |
|-----------------------------------|----------------------------------------------------------------|-------------------|
| Identification code               | r173                                                           |                   |
| Empirical formula                 | C <sub>12</sub> H <sub>9</sub> N <sub>3</sub> O <sub>2</sub> S |                   |
| Formula weight                    | 259.28                                                         |                   |
| Temperature                       | 173(2) K                                                       |                   |
| Wavelength                        | 0.71073 Å                                                      |                   |
| Crystal system                    | TRICLINIC                                                      |                   |
| Space group                       | P-1                                                            |                   |
| Unit cell dimensions              | a = 7.3603(6) Å                                                | α = 75.5880(10)°. |
|                                   | b = 7.7084(6) Å                                                | β = 77.5530(10)°. |
|                                   | c = 11.8814(10) Å                                              | γ = 64.2470(10)°. |
| Volume                            | 583.57(8) Å <sup>3</sup>                                       |                   |
| Z                                 | 2                                                              |                   |
| Density (calculated)              | 1.476 Mg/m <sup>3</sup>                                        |                   |
| Absorption coefficient            | 0.274 mm <sup>-1</sup>                                         |                   |
| F(000)                            | 268                                                            |                   |
| Crystal color, morphology         | red, block                                                     |                   |
| Crystal size                      | 0.30 x 0.20 x 0.15 mm <sup>3</sup>                             |                   |
| Theta range for data collection   | 2.98 to 27.61°.                                                |                   |
| Index ranges                      | -9 ≤ h ≤ 9, -9 ≤ k ≤ 9, -15 ≤ l ≤ 15                           |                   |
| Reflections collected             | 6728                                                           |                   |
| Independent reflections           | 2654 [R(int) = 0.0198]                                         |                   |
| Completeness to theta = 27.61°    | 97.8 %                                                         |                   |
| Absorption correction             | Multi-scan                                                     |                   |
| Max. and min. transmission        | 0.9601 and 0.9223                                              |                   |
| Refinement method                 | Full-matrix least-squares on F <sup>2</sup>                    |                   |
| Data / restraints / parameters    | 2654 / 0 / 163                                                 |                   |
| Goodness-of-fit on F <sup>2</sup> | 0.975                                                          |                   |
| Final R indices [I > 2σ(I)]       | R1 = 0.0341, wR2 = 0.0931                                      |                   |
| R indices (all data)              | R1 = 0.0385, wR2 = 0.0976                                      |                   |
| Largest diff. peak and hole       | 0.372 and -0.362 e.Å <sup>-3</sup>                             |                   |

**Table S11.** Crystal data and structure refinement for polymorph R at 223K.

|                                   |                                                                |                   |
|-----------------------------------|----------------------------------------------------------------|-------------------|
| Identification code               | r223                                                           |                   |
| Empirical formula                 | C <sub>12</sub> H <sub>9</sub> N <sub>3</sub> O <sub>2</sub> S |                   |
| Formula weight                    | 259.28                                                         |                   |
| Temperature                       | 223(2) K                                                       |                   |
| Wavelength                        | 0.71073 Å                                                      |                   |
| Crystal system                    | TRICLINIC                                                      |                   |
| Space group                       | P-1                                                            |                   |
| Unit cell dimensions              | a = 7.4072(6) Å                                                | α = 75.5590(10)°. |
|                                   | b = 7.7365(7) Å                                                | β = 77.6470(10)°. |
|                                   | c = 11.8875(10) Å                                              | γ = 64.0160(10)°. |
| Volume                            | 588.71(9) Å <sup>3</sup>                                       |                   |
| Z                                 | 2                                                              |                   |
| Density (calculated)              | 1.463 Mg/m <sup>3</sup>                                        |                   |
| Absorption coefficient            | 0.272 mm <sup>-1</sup>                                         |                   |
| F(000)                            | 268                                                            |                   |
| Crystal color, morphology         | red, block                                                     |                   |
| Crystal size                      | 0.30 x 0.20 x 0.15 mm <sup>3</sup>                             |                   |
| Theta range for data collection   | 2.98 to 27.56°.                                                |                   |
| Index ranges                      | -9 ≤ h ≤ 9, -9 ≤ k ≤ 9, -15 ≤ l ≤ 15                           |                   |
| Reflections collected             | 6797                                                           |                   |
| Independent reflections           | 2668 [R(int) = 0.0194]                                         |                   |
| Completeness to theta = 27.56°    | 98.0 %                                                         |                   |
| Absorption correction             | Multi-scan                                                     |                   |
| Max. and min. transmission        | 0.9604 and 0.9230                                              |                   |
| Refinement method                 | Full-matrix least-squares on F <sup>2</sup>                    |                   |
| Data / restraints / parameters    | 2668 / 0 / 163                                                 |                   |
| Goodness-of-fit on F <sup>2</sup> | 1.066                                                          |                   |
| Final R indices [I > 2σ(I)]       | R1 = 0.0356, wR2 = 0.0961                                      |                   |
| R indices (all data)              | R1 = 0.0417, wR2 = 0.1017                                      |                   |
| Largest diff. peak and hole       | 0.263 and -0.299 e.Å <sup>-3</sup>                             |                   |

**Table S12.** Crystal data and structure refinement for polymorph R at 273K.

|                                   |                                                                |                   |
|-----------------------------------|----------------------------------------------------------------|-------------------|
| Identification code               | r273                                                           |                   |
| Empirical formula                 | C <sub>12</sub> H <sub>9</sub> N <sub>3</sub> O <sub>2</sub> S |                   |
| Formula weight                    | 259.28                                                         |                   |
| Temperature                       | 273(2) K                                                       |                   |
| Wavelength                        | 0.71073 Å                                                      |                   |
| Crystal system                    | TRICLINIC                                                      |                   |
| Space group                       | P-1                                                            |                   |
| Unit cell dimensions              | a = 7.4662(10) Å                                               | α = 75.5160(10)°. |
|                                   | b = 7.7727(10) Å                                               | β = 77.7670(10)°. |
|                                   | c = 11.8977(15) Å                                              | γ = 63.7330(10)°. |
| Volume                            | 595.39(13) Å <sup>3</sup>                                      |                   |
| Z                                 | 2                                                              |                   |
| Density (calculated)              | 1.446 Mg/m <sup>3</sup>                                        |                   |
| Absorption coefficient            | 0.269 mm <sup>-1</sup>                                         |                   |
| F(000)                            | 268                                                            |                   |
| Crystal color, morphology         | red, block                                                     |                   |
| Crystal size                      | 0.30 x 0.20 x 0.15 mm <sup>3</sup>                             |                   |
| Theta range for data collection   | 2.97 to 27.70°.                                                |                   |
| Index ranges                      | -9 ≤ h ≤ 9, -10 ≤ k ≤ 10, -15 ≤ l ≤ 15                         |                   |
| Reflections collected             | 6871                                                           |                   |
| Independent reflections           | 2717 [R(int) = 0.0198]                                         |                   |
| Completeness to theta = 27.70°    | 96.9 %                                                         |                   |
| Absorption correction             | Multi-scan                                                     |                   |
| Max. and min. transmission        | 0.9608 and 0.9238                                              |                   |
| Refinement method                 | Full-matrix least-squares on F <sup>2</sup>                    |                   |
| Data / restraints / parameters    | 2717 / 0 / 163                                                 |                   |
| Goodness-of-fit on F <sup>2</sup> | 1.015                                                          |                   |
| Final R indices [I > 2σ(I)]       | R1 = 0.0365, wR2 = 0.1028                                      |                   |
| R indices (all data)              | R1 = 0.0427, wR2 = 0.1097                                      |                   |
| Largest diff. peak and hole       | 0.286 and -0.274 e.Å <sup>-3</sup>                             |                   |

**Table S13.** Crystal data and structure refinement for polymorph ON at 123K.

|                                   |                                             |                             |
|-----------------------------------|---------------------------------------------|-----------------------------|
| Identification code               | on123                                       |                             |
| Empirical formula                 | C12 H9 N3 O2 S                              |                             |
| Formula weight                    | 259.28                                      |                             |
| Temperature                       | 123(2) K                                    |                             |
| Wavelength                        | 0.71073 Å                                   |                             |
| Crystal system                    | MONOCLINIC                                  |                             |
| Space group                       | P2(1)/c                                     |                             |
| Unit cell dimensions              | a = 3.8652(15) Å                            | $\alpha = 90.00^\circ$ .    |
|                                   | b = 18.528(7) Å                             | $\beta = 92.653(6)^\circ$ . |
|                                   | c = 16.391(6) Å                             | $\gamma = 90.00^\circ$ .    |
| Volume                            | 1172.6(8) Å <sup>3</sup>                    |                             |
| Z                                 | 4                                           |                             |
| Density (calculated)              | 1.469 Mg/m <sup>3</sup>                     |                             |
| Absorption coefficient            | 0.273 mm <sup>-1</sup>                      |                             |
| F(000)                            | 536                                         |                             |
| Crystal color, morphology         | orange, needle                              |                             |
| Crystal size                      | 0.10 x 0.05 x 0.03 mm <sup>3</sup>          |                             |
| Theta range for data collection   | 2.97 to 27.70°.                             |                             |
| Index ranges                      | -4 ≤ h ≤ 4, -21 ≤ k ≤ 22, -19 ≤ l ≤ 19      |                             |
| Reflections collected             | 9783                                        |                             |
| Independent reflections           | 1888 [R(int) = 0.1353]                      |                             |
| Completeness to theta = 24.99°    | 91.2 %                                      |                             |
| Absorption correction             | Multi-scan                                  |                             |
| Max. and min. transmission        | 0.9919 and 0.9732                           |                             |
| Refinement method                 | Full-matrix least-squares on F <sup>2</sup> |                             |
| Data / restraints / parameters    | 1888 / 0 / 163                              |                             |
| Goodness-of-fit on F <sup>2</sup> | 0.959                                       |                             |
| Final R indices [I > 2σ(I)]       | R1 = 0.0630, wR2 = 0.1554                   |                             |
| R indices (all data)              | R1 = 0.1138, wR2 = 0.1854                   |                             |
| Largest diff. peak and hole       | 0.462 and -0.491 e.Å <sup>-3</sup>          |                             |
